# Supplementary material for: A novel 3D porous electrode of polyaniline and PEDOT:PSS coated SiNWs for low-cost and high-performance supercapacitors
Source: Royal Society of Chemistry journal article supplement (doi:10.1039/d1qm00774b), 2021-01-01
Supplement: d1qm00774b1.pdf [file d1qm00774b1.pdf]

## Supporting information

### **A novel 3D porous electrode of polyaniline and PEDOT:PSS coated SiNWs for low-cost and high-performance supercapacitors**

Xiaojuan Shen,<sup>\*a</sup> Xuan Zhang,<sup>a</sup> Tongfei Wang,<sup>a</sup> Songjun Li,<sup>\*a</sup> Zhaoqiang Li<sup>\*b</sup>

<sup>a</sup> *Research School of Polymeric Materials, School of Materials Science & Engineering, Jiangsu University, Zhenjiang, Jiangsu Province, 212013, China.*

<sup>b</sup> *Department of Chemical Engineering, University of Waterloo, Waterloo, ON N2L 3G1, Canada.*

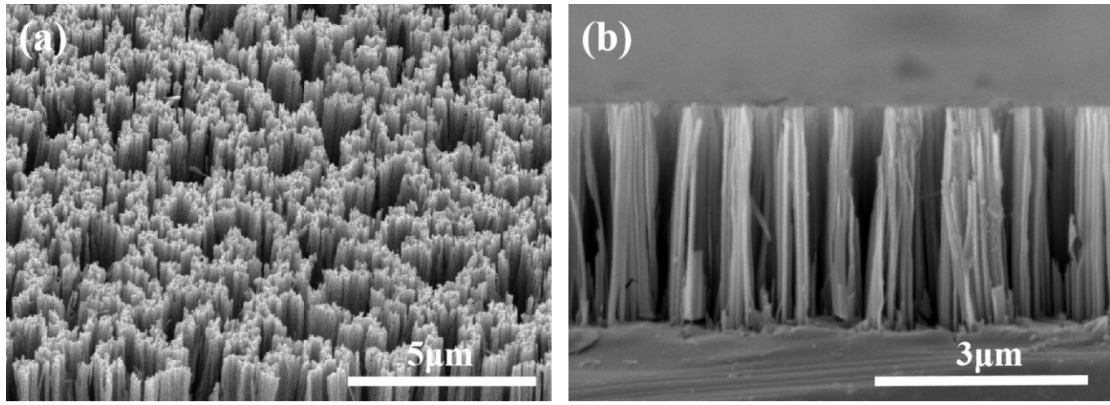

**Fig. S1** SEM image of SiNWs etched by MACE method for 60 min on EG Si wafer from (a) top view and (b) cross-section.

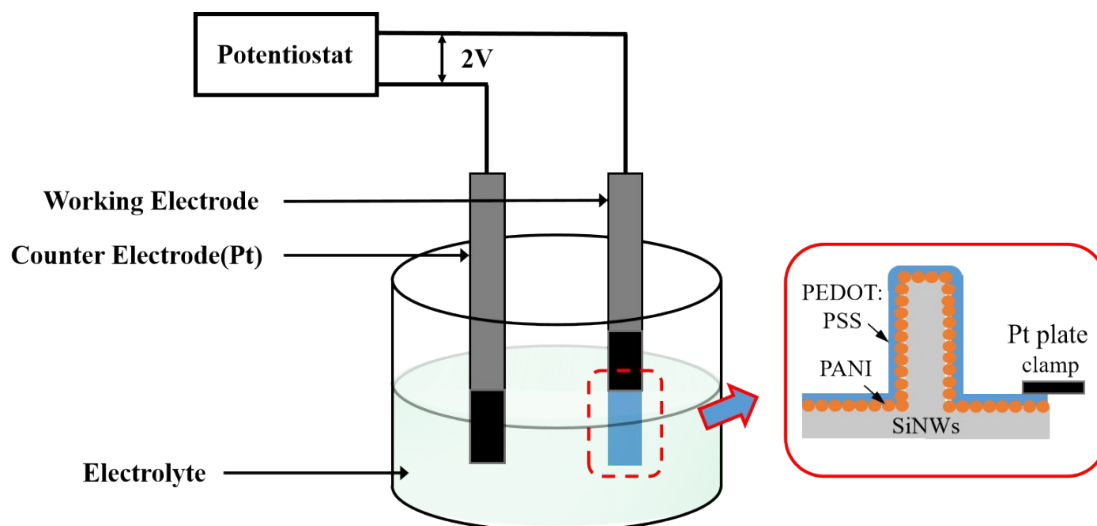

**Fig. S2** Schematic of the electropolymerization system. The SiAN substrate coated with the PEDOT:PSS layer is used as the working electrode. Pt plate clamp connects with the surface where PANI and PEDOT:PSS decorate on the SiNWs substrate.

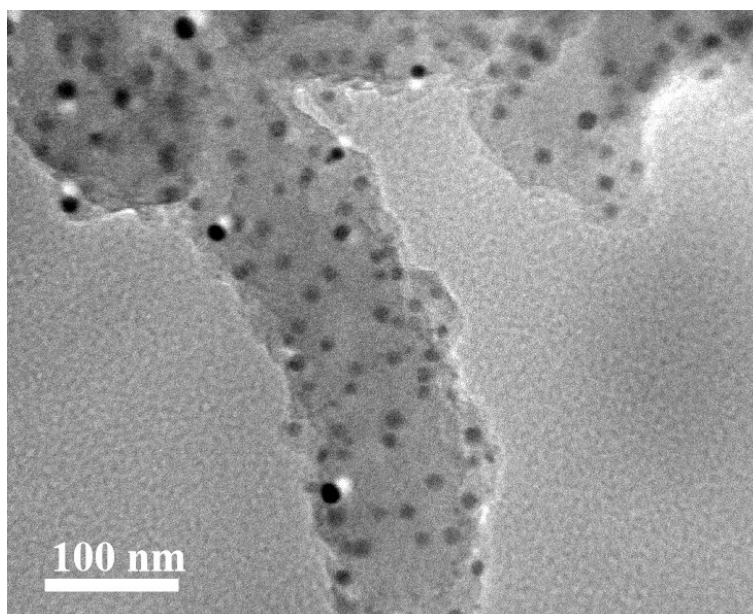

**Fig. S3** TEM image of PANF.

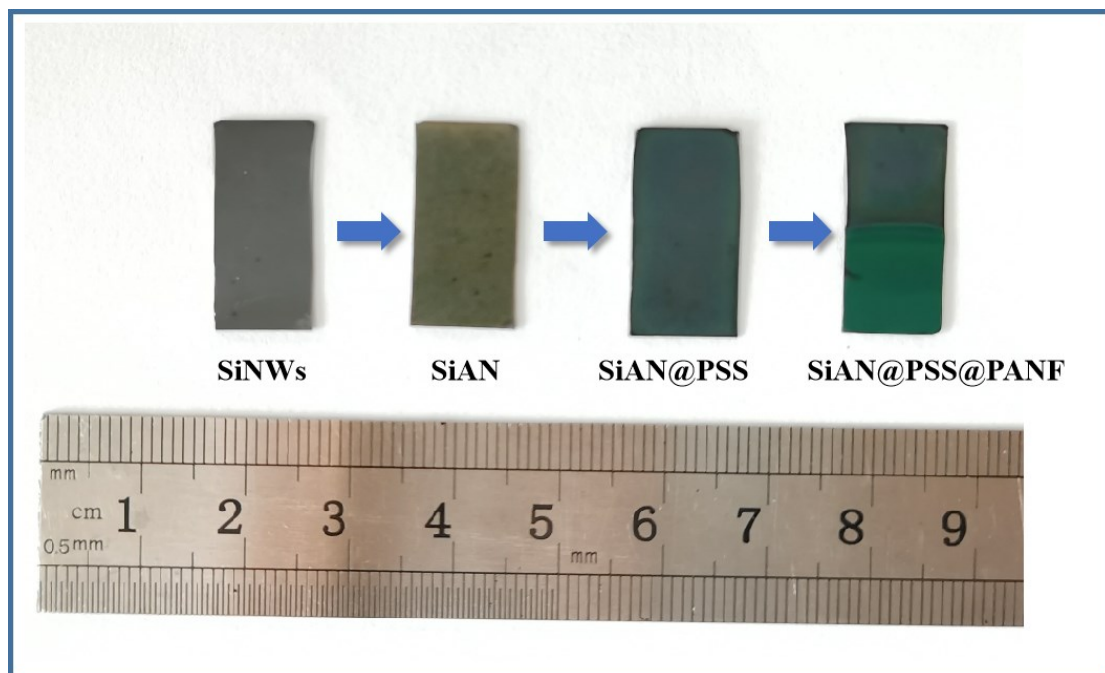

**Fig. S4** Photographs of the different fabricated Si substrates. The deposition time of PANF is 5 min.

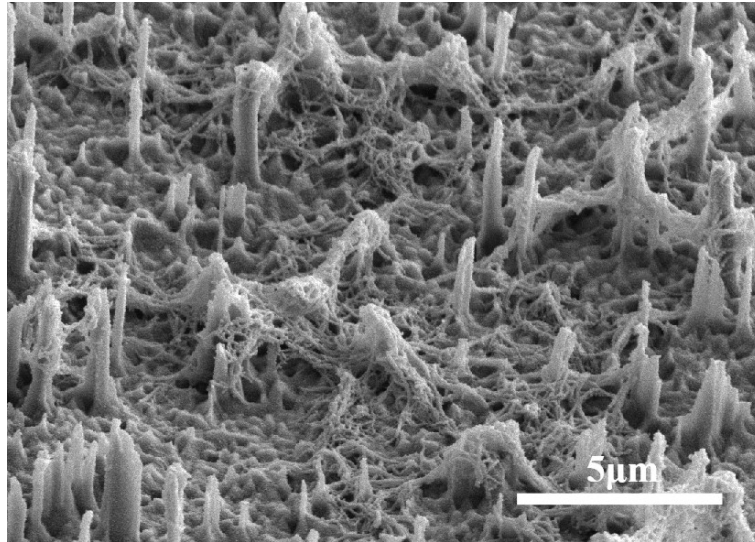

**Fig. S5** SEM image of polyaniline electrodeposited on the naked SiNWs substrate using the Ag as the rear electrode with the electrodeposition time of 10 min.

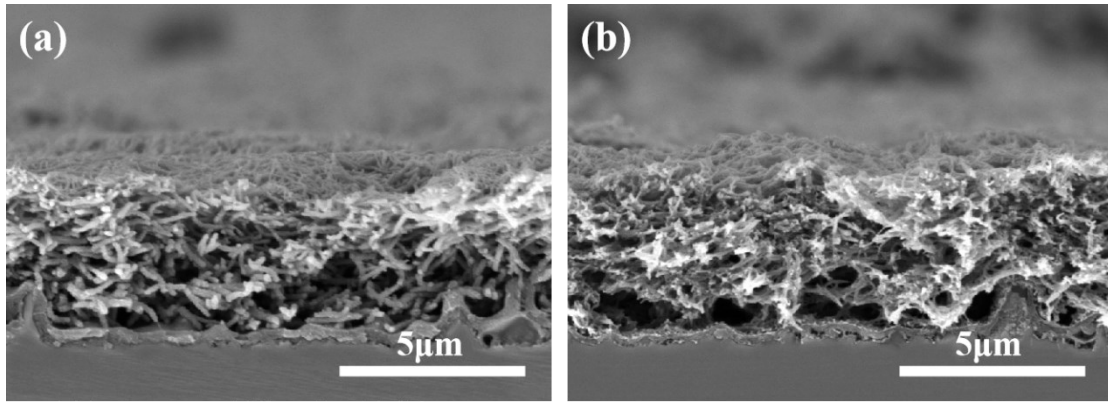

**Fig. S6** Cross-section SEM images of PANF synthesized on the SiAN@PSS substrates incorporated (a) without and (b) with graphene.

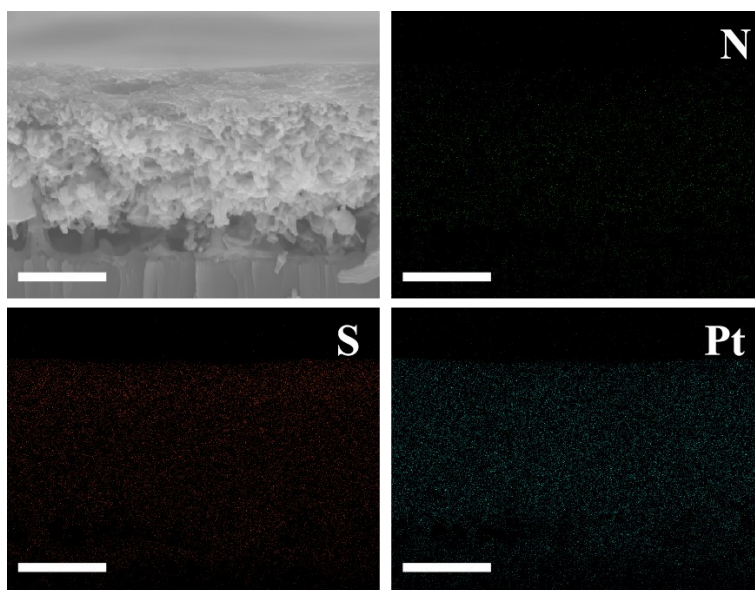

**Fig. S7** SiAN@PSS@GP coated with  $\text{H}_2\text{PtCl}_6$  doped PEDOT:PSS layer and the corresponding cross-section element mappings of N, S and Pt. The electrodeposition time of GP is 8 min. The scale bar is 5  $\mu\text{m}$ .



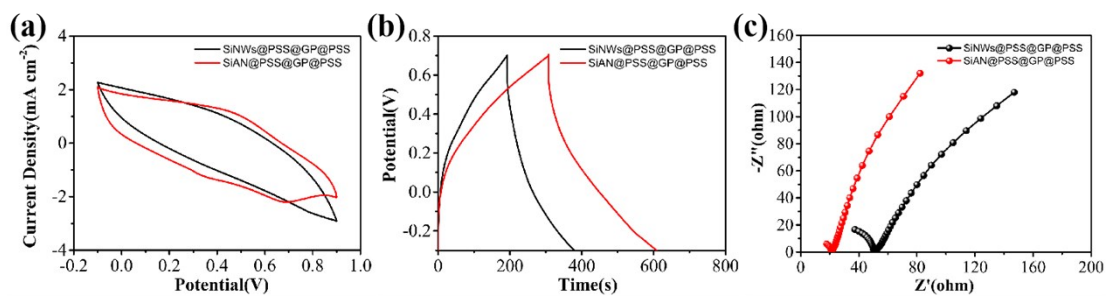

**Fig. S8** (a) CV curves measurement at  $10 \text{ mV s}^{-1}$ , (b) GCD measurement at the current density of  $1 \text{ mA cm}^{-2}$  and (c) Nyquist plots of the electrodes fabricated with PANI (SiAN@PSS@GP@PSS) and without PANI (SiNWs@PSS@GP@PSS) between the PEDOT:PSS and SiNWs. The electrodeposition time is 8 min.

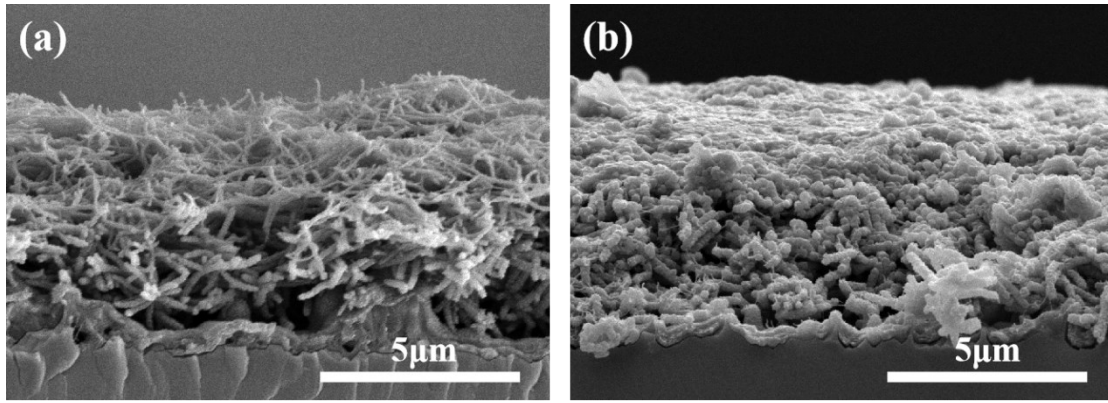

**Fig. S9** The cross-section SEM images of PANF synthesized on (a) SiAN@PSS substrate and (b) SiNWs@PSS substrate.

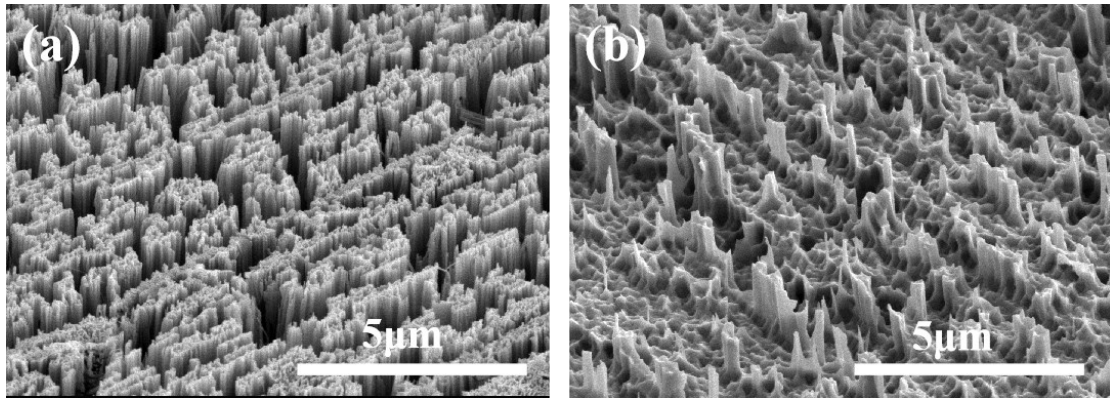

**Fig. S10** SEM images of (a) pristine SiNWs synthesized from SG Si wafer with MACE method for 30 min, (b) SiNWs treated by TMAH solution for 40 min.

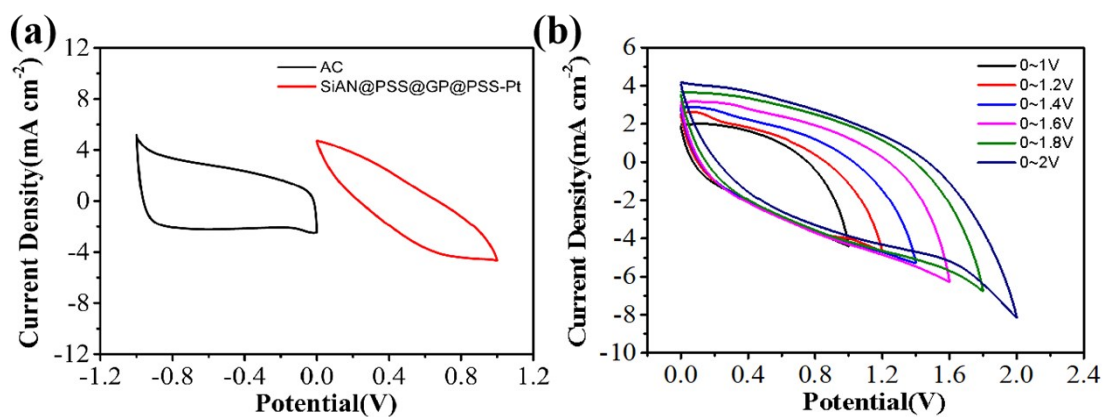

**Fig. S11** (a) CV curves obtained for AC and SiAN@PSS@GP@PSS-Pt electrodes at the scan rate of  $10 \text{ mV s}^{-1}$  and (b) the corresponding CV curves of the ASC in aqueous electrolyte for different potential windows at a scan rate of  $20 \text{ mV s}^{-1}$ .

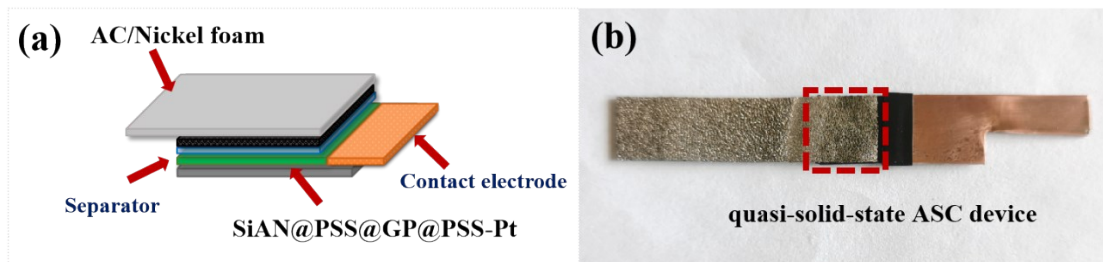

**Fig. S12** (a) A schematic illustration of the fabricated quasi-solid-state ASC device and (b) an optical image of the device.

**Table S1** Capacitance comparison of SiAN@PSS@GP@PSS-Pt electrode with the previously reported on-chip supercapacitor electrodes using 3D Si nanostructure.

| Type                                          | Electrode material                                | Si growth | Capacitance (mF cm <sup>-2</sup> ) | Test Condition               | Device configuration            | Electrolyte                        | Refs |
|-----------------------------------------------|---------------------------------------------------|-----------|------------------------------------|------------------------------|---------------------------------|------------------------------------|------|
| 1                                             | SiNWs                                             | CVD       | 0.046                              | 50mV s <sup>-1</sup> ,0.7V   | 2-electrode                     | IL/PC <sup>(a)</sup>               | 1    |
|                                               | SiNWs                                             | CVD       | 0.013                              | 100mV s <sup>-1</sup> ,1.5V  | 2-electrode                     | IL                                 | 2    |
|                                               | SiNTrs                                            | CVD       | 0.35                               | 1mA cm <sup>-2</sup> ,4 V    | 2-electrode                     | IL                                 | 3    |
|                                               | Oxidized-SiNWs                                    | Etching   | 0.404                              | 50mV s <sup>-1</sup> ,1.5V   | 3-electrode                     | IL                                 | 4    |
|                                               | SiNWs/PEDOT                                       | CVD       | 9                                  | 0.1mA cm <sup>-2</sup> ,1.5V | 2-electrode                     | IL                                 | 5    |
|                                               | PEDOT@SiNWs                                       | Etching   | 115                                | 0.5mA cm <sup>-2</sup> ,1V   | 3-electrode                     | IL                                 | 6    |
|                                               |                                                   |           | 39.2                               | 0.25mA cm <sup>-2</sup> ,1V  | 2-electrode                     |                                    |      |
|                                               |                                                   |           | 14                                 | 1mA cm <sup>-2</sup> ,1.5V   | 2-electrode                     | IL                                 | 7    |
|                                               | SiNTrs/PPy                                        | CVD       | 19                                 | 5mV s <sup>-1</sup> ,1V      | 3-electrode                     | Na <sub>2</sub> SO <sub>4</sub>    | 8    |
|                                               |                                                   |           | 6.5                                | 2mV s <sup>-1</sup> ,1V      | 2-electrode                     | PVA/H <sub>2</sub> SO <sub>4</sub> |      |
| 2                                             | SiNWs/MnO <sub>2</sub>                            | CVD       | 13                                 | 0.4mA cm <sup>-2</sup> ,2.2V | 3-electrode                     | LiClO <sub>4</sub> -IL             | 9    |
| In <sub>2</sub> O <sub>3</sub> /mesoporous Si | CVD                                               | 1.36      | 10mV s <sup>-1</sup> ,1.2V         | 3-electrode                  | Na <sub>2</sub> SO <sub>4</sub> | 10                                 |      |
|                                               |                                                   | 25.64     | 0.1mA cm <sup>-2</sup> ,0.7V       | 3-electrode                  | Na <sub>2</sub> SO <sub>4</sub> | 11                                 |      |
|                                               | C@SiNWs                                           | Etching   |                                    |                              |                                 |                                    |      |
|                                               | Diamond/SiNWs                                     | CVD       | 1.9                                | 0.1mA cm <sup>-2</sup> ,4V   | 2-electrode                     | IL                                 | 12   |
|                                               | rGO-SiNWs                                         | HWCVP     | 0.24                               | 10μA cm <sup>-2</sup> , 1.3V | 3-electrode                     | IL                                 | 13   |
|                                               | C/PSiNWs                                          | Etching   | 190                                | 1mA cm <sup>-2</sup> , 0.8V  | 3-electrode                     | IL                                 | 14   |
|                                               | Si@Ti@TiN                                         | Etching   | 43.8                               | 1mA cm <sup>-2</sup> ,0.8V   | 2-electrode                     | H <sub>2</sub> SO <sub>4</sub>     | 15   |
| 3                                             | PEDOT/D@SiNWs                                     | CVD       | 9.5                                | 0.1mA cm <sup>-2</sup> ,2.5V | 2-electrode                     | IL                                 | 16   |
|                                               |                                                   |           | 106                                | 0.5mA cm <sup>-2</sup> ,1.5V | 3-electrode                     | IL                                 | 17   |
|                                               | SiNWs/PEDOT@PPy                                   | Etching   | 46.5                               | 0.5mA cm <sup>-2</sup> ,1.5V | 2-electrode                     |                                    |      |
|                                               | Al <sub>2</sub> O <sub>3</sub> /PEDOT:PS S /SiNWs | CVD       | 8.4                                | 20mV s <sup>-1</sup> ,1.2V   | 3-electrode                     | Na <sub>2</sub> SO <sub>4</sub>    | 18   |

|                             |         |             |                                 |             |                                 |           |
|-----------------------------|---------|-------------|---------------------------------|-------------|---------------------------------|-----------|
| SiNWs/C/MnOx                | Etching | 381         | 12.5mA cm <sup>-2</sup> , 2.95V | 3-electrode | IL                              | 19        |
| SiNWs/NC@NiO                | Etching | 110         | 1mA cm <sup>-2</sup> , 0.4V     | 3-electrode | KOH                             | 20        |
| Si-TNR/TiN/MnO <sub>2</sub> | Etching | 125         | 0.2mA cm <sup>-2</sup> , 3.6 V  | 3-electrode | Na <sub>2</sub> SO <sub>4</sub> | 21        |
|                             |         | 39.7        | 0.25mA cm <sup>-2</sup> , 0.8V  | 2-electrode | Na <sub>2</sub> SO <sub>4</sub> |           |
| SiNWs/C/NCO                 | Etching | 1650        | 3mA cm <sup>-2</sup> , 0.45V    | 3-electrode | KOH                             | 22        |
|                             |         | 560         | 1mA cm <sup>-2</sup> , 0.8V     | 2-electrode | KOH                             |           |
| PANI/GNW/SiNWs              | Etching | 185         | 10mV s <sup>-1</sup> , 1V       | 3-electrode | H <sub>2</sub> SO <sub>4</sub>  | 23        |
| SiAN@PSS@GP                 | Etching | 790.89 (EG) | 1mA cm <sup>-2</sup> , 1V       | 3-electrode | Na <sub>2</sub> SO <sub>4</sub> | This work |
| @PSS-Pt                     |         | 718.85 (SG) |                                 |             |                                 |           |

1: Pristine Si, 2: Binary composite, 3: Ternary composite.

(a)IL: ionic liquid, PC: Polycarbonate.

**Table S2** Comparison of energy density and power density of SiAN@PSS@GP@PSS-Pt//AC with the previous reported Si-based devices.

| System                                          | Electrolyte                               | E (mWh cm <sup>-2</sup> ) | P (mW cm <sup>-2</sup> ) | Refs      |
|-------------------------------------------------|-------------------------------------------|---------------------------|--------------------------|-----------|
| Graphene/Si                                     | PYR <sub>13</sub> TFSI                    | 0.004                     | 4                        | 24        |
| PEDOT/PPy/SiNWs                                 | PYR <sub>13</sub> TFSI                    | 0.0146                    | 0.315                    | 17        |
| In <sub>2</sub> O <sub>3</sub> /mesoporous Si   | 1M Na <sub>2</sub> SO <sub>4</sub>        | 0.00059                   | 0.03                     | 10        |
| Diamond/SiNWs                                   | PMPyrrBTA                                 | 0.00013                   | 0.15                     | 25        |
| Diamond/SiNWs                                   | 40%PMPyrrTFSI/PC                          | 0.023                     | 0.94                     | 26        |
| PPy/SiNTrs                                      | PYR <sub>13</sub> TFSI                    | 0.004                     | 0.8                      | 7         |
| Al <sub>2</sub> O <sub>3</sub> /PEDOT:PSS/SiNWs | 0.5 M Na <sub>2</sub> SO <sub>4</sub>     | 0.0023                    | 4.1                      | 18        |
| Ru/SiNWs                                        | 0.5 M H <sub>2</sub> SO <sub>4</sub> /PVA | 0.035                     | 0.5                      | 27        |
| RuO <sub>2</sub> /SiNWs                         | H <sub>2</sub> SO <sub>4</sub> /PVA       | 0.0004                    | 0.03                     | 8         |
| C@SiNWs                                         | 1 M Na <sub>2</sub> SO <sub>4</sub>       | 0.04                      | 0.00175                  | 11        |
| MnOx/C/PSiNW                                    | 0.1M EMIM-TFSI                            | 0.555                     | 0.48                     | 19        |
| PEDOT/D/SiNWs                                   | N <sub>1114</sub> TFSI                    | 0.007                     | 1.3                      | 16        |
| GNW/RuOx/Si                                     | H <sub>3</sub> PO <sub>4</sub> /PVA       | 0.0151                    | 2.49                     | 28        |
| PEDOT coated SiNWs                              | N <sub>1114</sub> TFSI                    | 0.0092                    | 0.11                     | 6         |
| Graphene/PANI/SiNWs                             | 1M H <sub>2</sub> SO <sub>4</sub>         | 0.0117                    | 0.42                     | 29        |
| SiAN@PSS@GP@PSS-Pt                              | 1M Na <sub>2</sub> SO <sub>4</sub>        | 0.194                     | 0.850                    | This work |
| //AC                                            | PVDF-HFP/IL                               | 0.063                     | 0.801                    |           |



## References

- 1 F. Thissandier, A. Le Comte, O. Crosnier, P. Gentile, G. Bidan, E. Hadji, T. Brousse and S. Sadki, Highly doped silicon nanowires based electrodes for micro-electrochemical capacitor applications, *Electrochem. Commun.*, 2012, **25**, 109-111.
- 2 A. Soam, N. Arya, A. Singh and R. Dusane, Fabrication of silicon nanowires based on-chip micro-supercapacitor, *Chem. Phys. Lett.*, 2017, **678**, 46-50.
- 3 D. Gaboriau, D. Aradilla, M. Brachet, J. Le Bideau, T. Brousse, G. Bidan, P. Gentile and S. Sadki, Silicon nanowires and nanotrees: elaboration and optimization of new 3D architectures for high performance on-chip supercapacitors, *RSC Adv.*, 2016, **6**, 81017-81027.
- 4 L. Qiao, A. Shougee, T. Albrecht and K. Fobelets, Oxide-coated silicon nanowire array capacitor electrodes in room temperature ionic liquid, *Electrochim. Acta*, 2016, **210**, 32-37.
- 5 D. Aradilla, G. Bidan, P. Gentile, P. Weathers, F. Thissandier, V. Ruiz, P. Gómez-Romero, T. J. S. Schubert, H. Sahin and S. Sadki, Novel hybrid micro-supercapacitor based on conducting polymer coated silicon nanowires for electrochemical energy storage, *RSC Adv.*, 2014, **4**, 26462-26467.
- 6 X. Shen, C. Liu, X. Zhang, J. Li, J. Zhao and S. Li, High capacitive PEDOT-coated SiNWs electrode for micro-supercapacitors with facile preparation, *J. Inorg. Organomet. Polym.*, 2020, **30**, 3722-3734.
- 7 D. Aradilla, D. Gaboriau, G. Bidan, P. Gentile, M. Boniface, D. Dubal, P. Gómez-Romero, J. Wimberg, T. J. S. Schubert and S. Sadki, Innovative 3-D nanoforest heterostructure made of polypyrrole coated silicon nanotrees for new high performance hybrid micro-supercapacitor, *J. Mater. Chem. A*, 2015, **3**, 13978-13985.
- 8 W. Zheng, Q. Cheng, D. Wang and C. V. Thompson, High-performance solid-state on-chip supercapacitors based on Si nanowires coated with ruthenium oxide via atomic layer deposition, *J. Power Sources*, 2017, **341**, 1-10.

- 9 D. P. Dubal, D. Aradilla, G. Bidan, P. Gentile, T. J. Schubert, J. Wimberg, S. Sadki and P. Gomez-Romero, 3D hierarchical assembly of ultrathin MnO<sub>2</sub> nanoflakes on silicon nanowires for high performance micro-supercapacitors in Li- doped ionic liquid, *Sci. Rep.*, 2015, **5**, 9771.
- 10 B. Zhu, X. Wu, W. J. Liu, H. L. Lu, D. W. Zhang, Z. Fan and S. J. Ding, High-performance on-chip supercapacitors based on mesoporous silicon coated with ultrathin atomic layer-deposited In<sub>2</sub>O<sub>3</sub> films, *ACS Appl. Mater. Interfaces*, 2019, **11**, 747-752.
- 11 R. R. Devarapalli, S. Szunerits, Y. Coffinier, M. V. Shelke and R. Boukherroub, Glucose-derived porous carbon-coated silicon nanowires as efficient electrodes for aqueous micro-supercapacitors, *ACS Appl. Mater. Interfaces*, 2016, **8**, 4298-4302.
- 12 D. Aradilla, F. Gao, G. Lewes-Malandrakis, W. Müller-Sebert, D. Gaboriau, P. Gentile, B. Iliev, T. Schubert, S. Sadki, G. Bidan and C. E. Nebel, A step forward into hierarchically nanostructured materials for high performance micro-supercapacitors: Diamond-coated SiNW electrodes in protic ionic liquid electrolyte, *Electrochem. Commun.*, 2016, **63**, 34-38.
- 13 A. Soam, P. Kavle, A. Kumbhar and R. O. Dusane, Performance enhancement of micro-supercapacitor by coating of graphene on silicon nanowires at room temperature, *Current Applied Physics*, 2017, **17**, 314-320.
- 14 J. P. Alper, S. Wang, F. Rossi, G. Salviati, N. Yiu, C. Carraro and R. Maboudian, Selective ultrathin carbon sheath on porous silicon nanowires: materials for extremely high energy density planar micro-supercapacitors, *Nano Lett.*, 2014, **14**, 1843-1847.
- 15 B. Wei, H. Liang, Z. Qi, D. Zhang, H. Shen, W. Hu and Z. Wang, Construction of 3D Si@Ti@TiN thin film arrays for aqueous symmetric supercapacitors, *Chem. Commun.*, 2019, **55**, 1402-1405.
- 16 D. Aradilla, F. Gao, G. Lewes-Malandrakis, W. Muller-Sebert, P. Gentile, M. Boniface, D. Aldakov, B. Iliev, T. J. Schubert, C. E. Nebel and G. Bidan, Designing 3D multihierarchical heteronanostructures for high-performance on-chip hybrid supercapacitors: poly(3,4-(ethylenedioxy)thiophene)-coated

- Diamond/silicon nanowire electrodes in an aprotic ionic liquid, *ACS Appl. Mater. Interfaces*, 2016, **8**, 18069-18077.
- 17 Q. Zhou, Y. Zhou, M. Bao and X. Ni, Modified silicon nanowires@polypyrrole core-shell nanostructures by poly(3,4-ethylenedioxythiophene) for high performance on-chip micro-supercapacitors, *Appl. Surf. Sci.*, 2019, **487**, 236-243.
  - 18 A. Valero, A. Mery, D. Gaboriau, P. Gentile and S. Sadki, One step deposition of PEDOT-PSS on ALD protected silicon nanowires: Toward ultrarobust aqueous microsupercapacitors, *ACS Appl. Energy Mater.*, 2018, **2**, 436-447.
  - 19 S. Ortaboy, J. P. Alper, F. Rossi, G. Bertoni, G. Salviati, C. Carraro and R. Maboudian, MnO<sub>x</sub>-decorated carbonized porous silicon nanowire electrodes for high performance supercapacitors, *Energ. Environ. Sci.*, 2017, **10**, 1505-1516.
  - 20 Q. Zhou, M. Bao and X. Ni, A novel surface modification of silicon nanowires by polydopamine to prepare SiNWs/NC@NiO electrode for high-performance supercapacitor, *Surf. Coat. Technol.*, 2020, DOI: 10.1016/j.surfcoat.2020.126660.
  - 21 P. Lu, E. Halvorsen, P. Ohlckers, L. Müller, S. Leopold, M. Hoffmann, K. Grigoras, J. Ahopelto, M. Prunnila and X. Chen, Ternary composite Si/TiN/MnO<sub>2</sub> taper nanorod array for on-chip supercapacitor, *Electrochim. Acta*, 2017, **248**, 397-408.
  - 22 N. R. Chodankar, I. V. Bagal, S.-W. Ryu and D.-H. Kim, Hybrid material passivation approach to stabilize the silicon nanowires in aqueous electrolyte for high-energy efficient supercapacitor, *Chem. Eng. J.*, 2019, **362**, 609-618.
  - 23 J. Li, N. Van Toan, Z. Wang and T. Ono, Metal-assisted-chemical-etching of silicon nanowires for templating 3D graphene growth towards energy storage in microsystems, *J. Micromech. Microeng.*, 2019, **29**.
  - 24 D. Aradilla, M. Delaunay, S. Sadki, J.-M. Gérard and G. Bidan, Vertically aligned graphene nanosheets on silicon using an ionic liquid electrolyte: towards high performance on-chip micro-supercapacitors, *J. Mater. Chem. A*, 2015, **3**, 19254-19262.
  - 25 G. S. Gund, D. P. Dubal, D. Aradilla, D. Gaboriau, P. Gentile, T. J. S. Schubert, W. Mueller-Sebert, G. Bidan, J. Wimberg, S. Sadki and P. G. Romeroa, Diamond-

- coated silicon nanowires for enhanced micro-supercapacitor with ionic liquids, *International Conference on Industrial Instrumentation and Control (ICIC)*, 2015, **978**, 4799-7165.
- 26 F. Gao, G. Lewes-Malandrakis, M. T. Wolfer, W. Müller-Sebert, P. Gentile, D. Aradilla, T. Schubert and C. E. Nebel, Diamond-coated silicon wires for supercapacitor applications in ionic liquids, *Diamond Relat. Mater.*, 2015, **51**, 1-6.
- 27 Y. Bencheikh, M. Harnois, R. Jijie, A. Addad, P. Roussel, S. Szunerits, T. Hadjersi, S. El Hak Abaidia and R. Boukherroub, High performance silicon nanowires/ruthenium nanoparticles micro-supercapacitors, *Electrochim. Acta*, 2019, **311**, 150-159.
- 28 J. Li, M. Zhu, Z. An, Z. Wang, M. Toda and T. Ono, Constructing in-chip micro-supercapacitors of 3D graphene nanowall/ruthenium oxides electrode through silicon-based microfabrication technique, *J. Power Sources*, 2018, **401**, 204-212.
- 29 N. Van Toan, T. T. Kim Tuoi, J. Li, N. Inomata and T. Ono, Liquid and solid states on-chip micro-supercapacitors using silicon nanowire-graphene nanowall-pani electrode based on microfabrication technology, *Mater. Res. Bull.*, 2020, **131**.
